# Supplementary material for: Functional Identification and Characterization of the Brassica Napus Transcription Factor Gene BnAP2, the Ortholog of Arabidopsis Thaliana APETALA2
Source: PubMed Central journal article supplement (PMC3314020; doi:10.1371/journal.pone.0033890), 2012-03-27
Supplement: pone.0033890.s001.pdf [file pone.0033890.s001.pdf]

**Supplemental Table S1.** List of primers used.

| Primer            | Sequence                            | Purpose of primers                                                                         |
|-------------------|-------------------------------------|--------------------------------------------------------------------------------------------|
| Full-AP2 For (P1) | 5' ATGTGGGATCTAAACGACGC 3'          | Amplification of <i>BnAP2</i> gene and for probe preparation                               |
| Full-AP2 Rev (P2) | 5' TTAAGAAGGTCTCATGAGAG 3'          |                                                                                            |
| AP2-260 Rev (P3)  | 5' CGAGGAAAGCTCGACCCGGG 3'          | RT-PCR of <i>BnAP2</i> gene as reverse primer, P1 as forward primer                        |
| Actin For (P4)    | 5' TGTATGTTGCTATCCAGGCT 3'          | Amplification of <i>actin</i> gene as internal control gene                                |
| Actin Rev (P5)    | 5' GTGAGAATCTTCATCAGGGA 3'          |                                                                                            |
| AP2 For (P6)      | 5' ACCAGATCTATGTGGGATCTAAACGACGC3'  | Construction of restorer vector                                                            |
| AP2 Rev (P7)      | 5' GGCAGATCTAGAAGGTCTCATGAGAG3'     |                                                                                            |
| △C1 Rev (P8)      | 5' CCAGAATTCGAGAATCCTCCTCCGCCATG3'  | Construction of various C-terminal <i>BnAP2</i> deletion mutants, P6 as the forward primer |
| △C2 Rev (P9)      | 5' GTCGAATTCGTTTCCCAAACCTCAAATCGA3' |                                                                                            |
| △C3 Rev (P10)     | 5' GTCGAATTCATAAACATACTTTTTGCCTA3'  |                                                                                            |
| △C4 Rev (P11)     | 5' CCGGAATTCCTTCATGTCATTATCATAAT3'  |                                                                                            |
| △C5 Rev (P12)     | 5' GGCGAATTCCTAGGTCCGACTGAGAGAACT3' |                                                                                            |
| AP2△N For (P13)   | 5' TAAGGATCCAGTTCTCTCAGTCGGACCTA3'  | Construction of N-ter <i>BnAP2</i> deletion mutant                                         |
| AP2△N Rev (P14)   | 5' GGCGAATTCCTTAAGAAGGTCTCATGAGAG3' |                                                                                            |
| AP2i For (P15)    | 5' ACAGAATTCATGTGGGATCTAAACGACGC3'  | Construction of <i>BnAP2</i> RNAi vector                                                   |
| AP2i Rev (P16)    | 5' TAAGGTACCAACTCCTTGACCTTGGTCCA3'  |                                                                                            |
| R-AP2i For (P17)  | 5' GGCTCTAGAATGTGGGATCTAAACGACGC3'  |                                                                                            |
| R-AP2i Rev (P18)  | 5' CACAGATCTAACTCCTTGACCTTGGTCCA3'  |                                                                                            |
| NPT II For (P19)  | 5' GATGGATTGCACGCAGGTTTC3'          | Amplification of NPT II gene                                                               |
| NPT II Rev (P20)  | 5' CTTGGACGCACGTTAGGTAG3'           |                                                                                            |
| 35S For (P21)     | 5' AGAATGCTAACCCACAGATG3'           | Amplification of 35S gene                                                                  |
| 35S Rev (P22)     | 5' GGATAGTGGGATTGTGCGTC3'           |                                                                                            |

The restriction enzyme sites added at the 5' end of primer sequences are underlined
